# Supplementary material
Source: ML conference proceedings conference paper supplement (https://openreview.net/forum?id=47loYmzxep)
Supplement: supplementary_material [file attachment]

We have established an anonymous repository to release our datasets, the code, model weight and the training log at <https://anonymous.4open.science/r/E2E-MFD>. The full repository will be released upon acceptance of the paper. We greatly appreciate your review and suggestion.
